# Supplementary material for: Effects of Caffeine Treatment on Hepatopulmonary Syndrome in Biliary Cirrhotic Rats
Source: MDPI journal article supplement (doi:10.3390/ijms20071566), 2019-03-28
Supplement: s1 [file s1]

# Liver

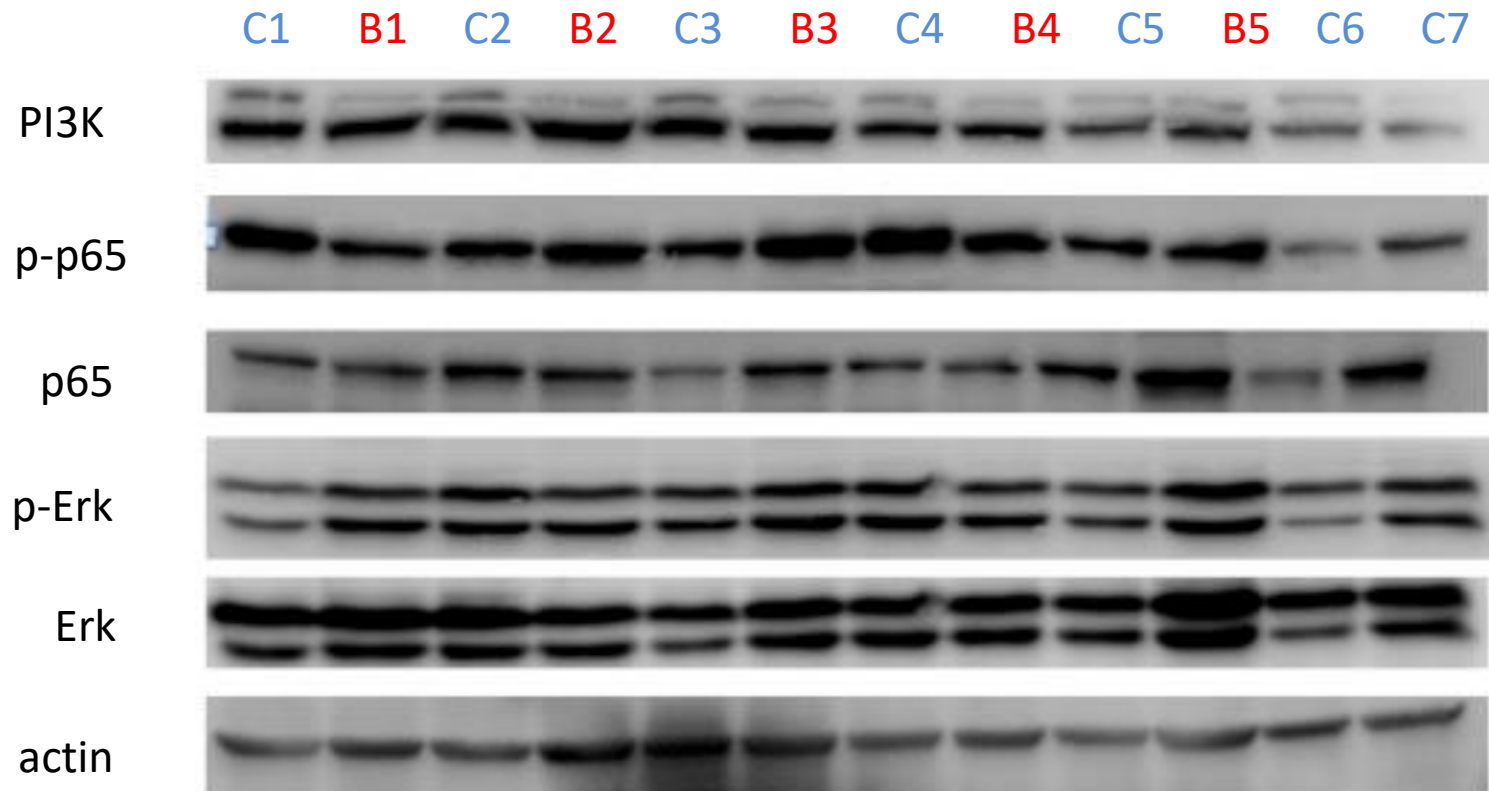

B: BDL (Caffeine 0mg)  
C: BDL + Caffeine 50mg

# Liver

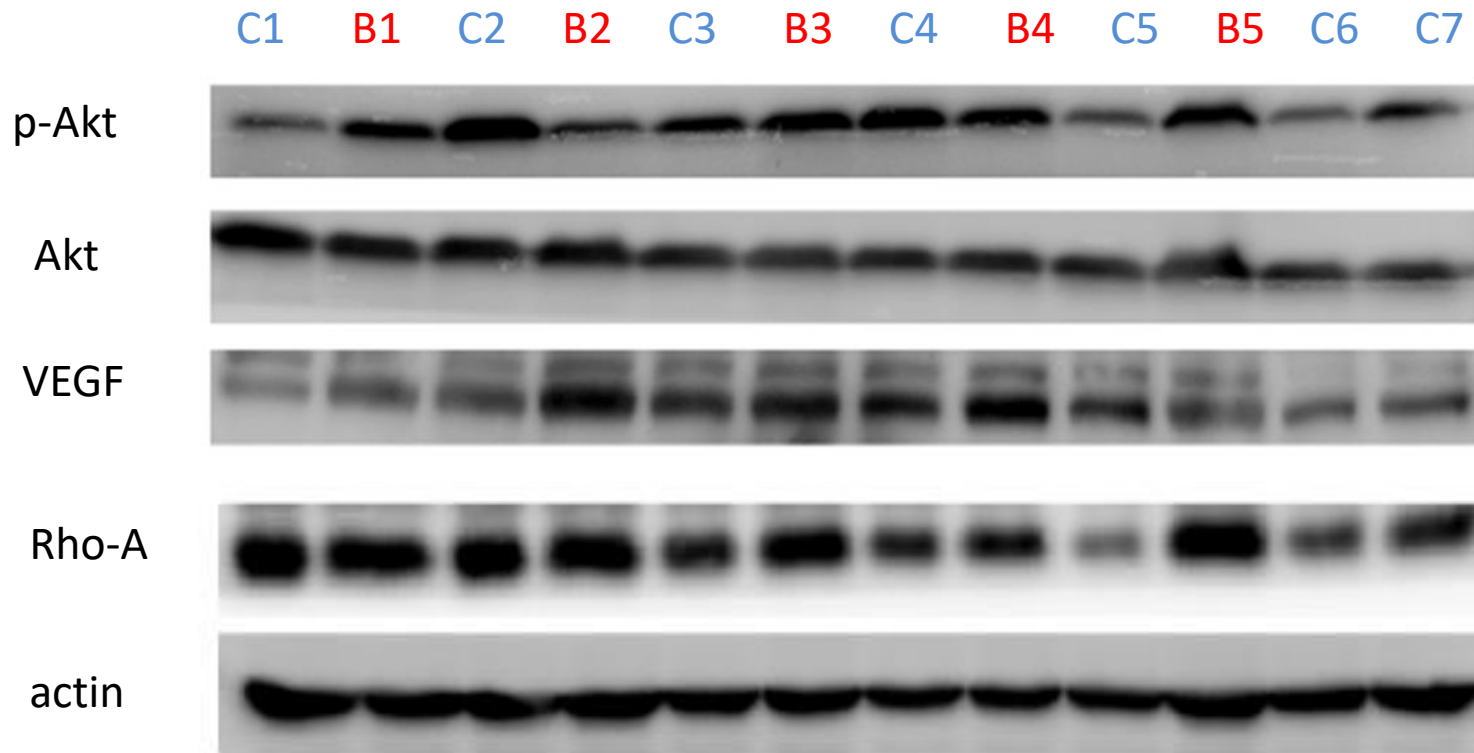

B: BDL (Caffeine 0mg)  
C: BDL + Caffeine 50mg

# Lung

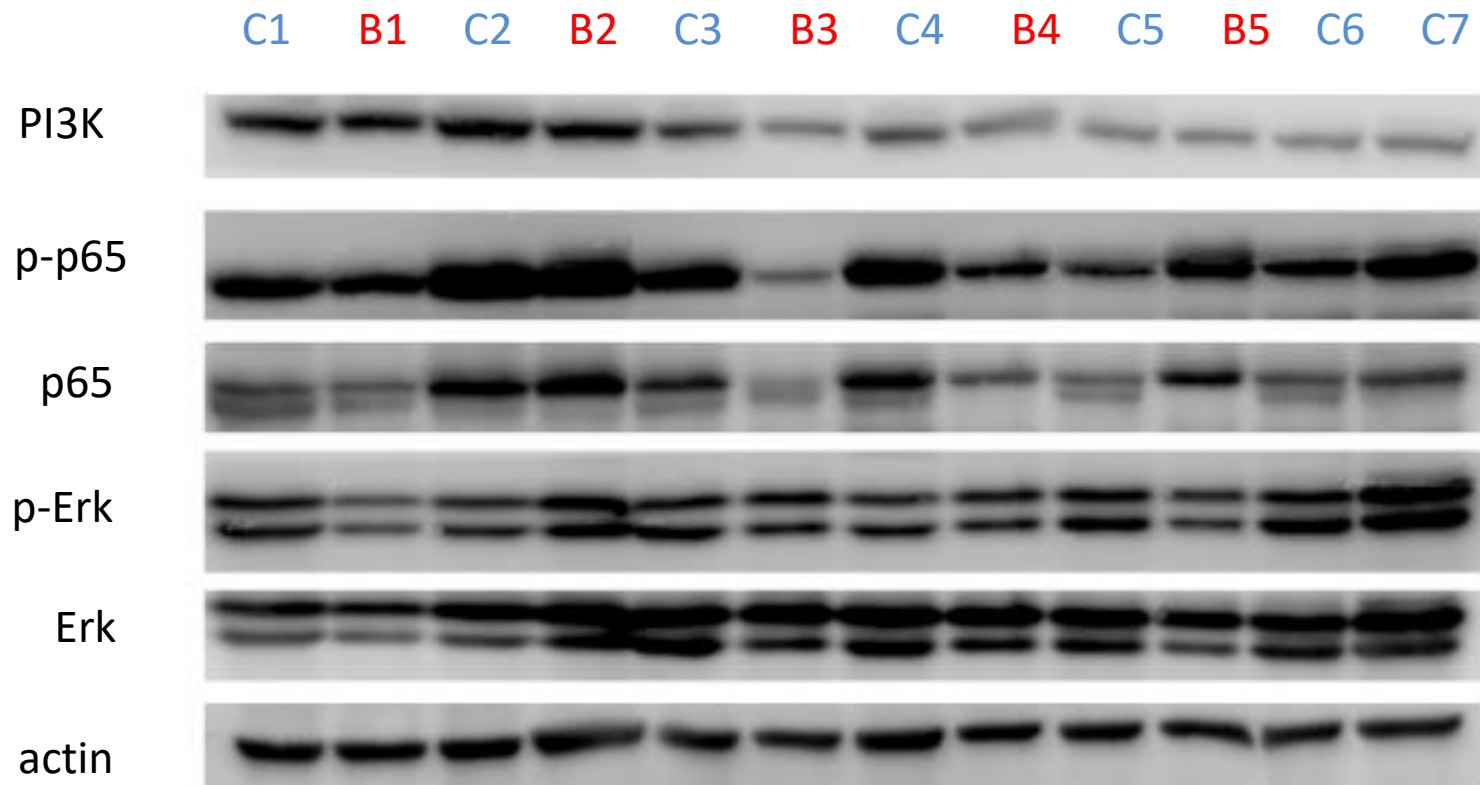

B: BDL (Caffeine 0mg)  
C: BDL + Caffeine 50mg

# Lung

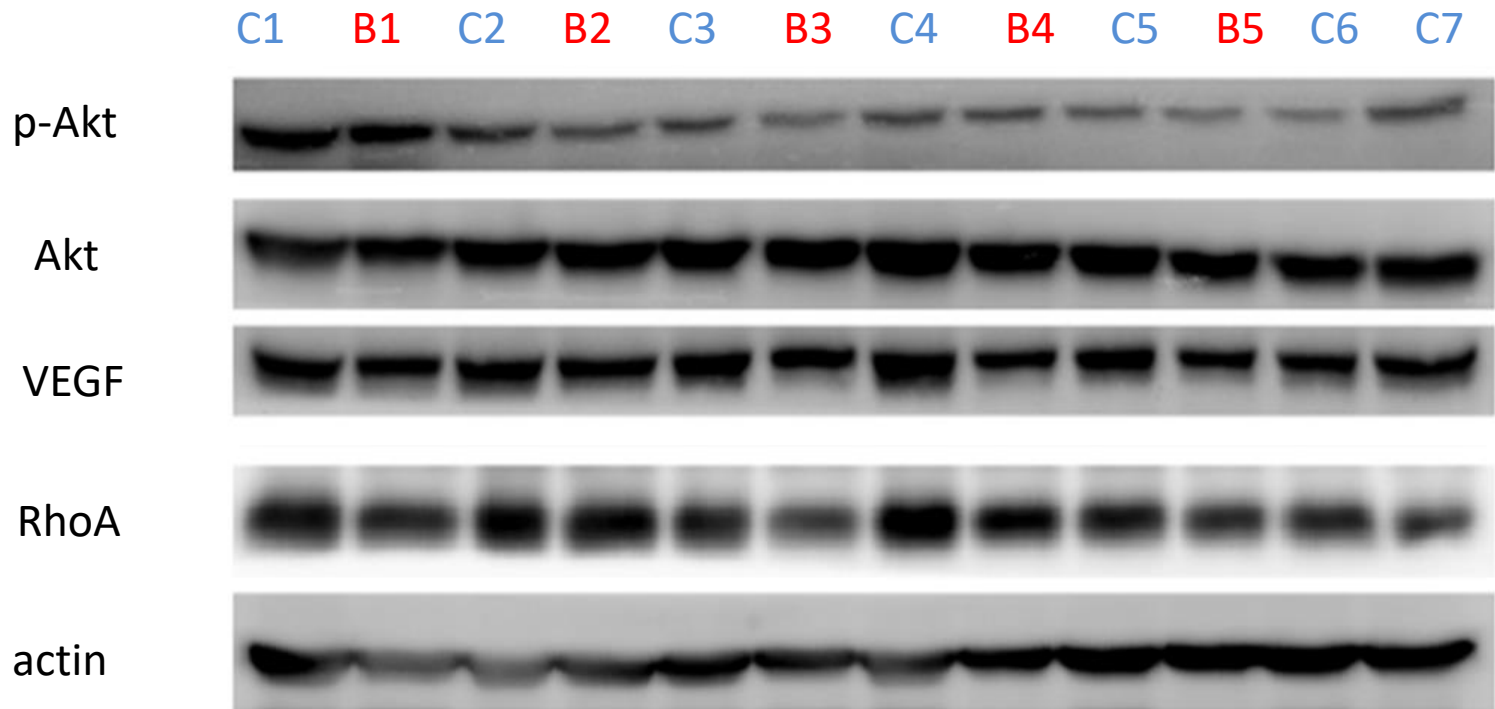

B: BDL (Caffeine 0mg)  
C: BDL + Caffeine 50mg
