# Supplementary material for: Effects of Caffeine Treatment on Hepatopulmonary Syndrome in Biliary Cirrhotic Rats
Source: MDPI journal article supplement (doi:10.3390/ijms20071566), 2019-03-28
Supplement: s1 [file s1]

Supplementary Table 1. Body weight, hemodynamic parameters, liver biochemistry, and arterial gas analysis of sham and CBDL rats receiving rosuvastatin or vehicle treatment

|                          | Sham rats    |             | CBDL rats                |                          |
|--------------------------|--------------|-------------|--------------------------|--------------------------|
|                          | Rosuvastatin | Control     | Rosuvastatin             | Control                  |
|                          | (n=11)       | (n=10)      | (n=11)                   | (n=10)                   |
| BW prior (g)             | 264 ± 20     | 279 ± 70    | 260 ± 16                 | 269 ± 12                 |
| BW post (g)              | 413 ± 24     | 410 ± 23    | 337 ± 27 <sup>a,*</sup>  | 371 ± 27                 |
| MAP (mmHg)               | 128 ± 13     | 122 ± 14    | 109 ± 14 <sup>*</sup>    | 110 ± 14 <sup>*</sup>    |
| PP (mmHg)                | 6.7 ± 2.3    | 7.5 ± 1.1   | 15.9 ± 2.5 <sup>*</sup>  | 15.9 ± 2.4 <sup>*</sup>  |
| HR (beats/min)           | 398 ± 52     | 394 ± 56    | 353 ± 45                 | 369 ± 53                 |
| ALT (IU/L)               | 74 ± 22      | 76 ± 21     | 201 ± 164 <sup>*</sup>   | 234 ± 95 <sup>*</sup>    |
| AST (IU/L)               | 296 ± 123    | 320 ± 100   | 1362 ± 1162 <sup>*</sup> | 1262 ± 340 <sup>*</sup>  |
| TB (mg/dL)               | 0.09 ± 0.01  | 0.08 ± 0.01 | 7.96 ± 1.22 <sup>*</sup> | 8.21 ± 1.58 <sup>*</sup> |
| PaO <sub>2</sub> (mmHg)  | 89.5 ± 4.1   | 91.9 ± 4.9  | 90.7 ± 4.3 <sup>#</sup>  | 85.4 ± 5.6 <sup>b</sup>  |
| PaCO <sub>2</sub> (mmHg) | 39.7 ± 4.0   | 39.1 ± 2.7  | 37.3 ± 3.2               | 36.9 ± 3.5               |
| AaPO <sub>2</sub> (mmHg) | 10.9 ± 4.1   | 9.3 ± 2.4   | 12.6 ± 2.2 <sup>a</sup>  | 18.5 ± 4.2 <sup>*</sup>  |
| VEGF (pg/ml)             | NA           | NA          | 17.0 ± 2.9 <sup>a</sup>  | 20.7 ± 4.9               |
| TNF-α(pg/ml)             | NA           | NA          | 20.1 ± 4.4 <sup>a</sup>  | 24.9 ± 3.7               |

BW prior: body weight before CBDL or sham operation; BW post: body weight after different treatments; MAP: mean arterial pressure; PP: portal pressure; HR: heart rate; AST: aspartate aminotransferase, ALT: alanine aminotransferase, TB: total bilirubin; PaO<sub>2</sub>: partial pressure of oxygen; PaCO<sub>2</sub>: partial pressure of carbon dioxide; AaPO<sub>2</sub>: alveolar arterial oxygen gradient; VEGF: vascular endothelial growth factor; TNF- $\alpha$ : tumor necrosis factor  $\alpha$ ; NA: non-analysis; <sup>a</sup> P < 0.05 compared with CBDL rats with vehicle treatment; <sup>b</sup> P < 0.05 compared with sham rats with vehicle treatment; \* P < 0.05 compared with sham rats with or without rosuvastatin treatment; <sup>#</sup> P = 0.061 compared with CBDL rats with vehicle treatment.

From Chang, C.C. et al. Rosuvastatin improves hepatopulmonary syndrome through inhibition of inflammatory angiogenesis of lung. Clin. Sci (Lond). **2015**, 129, 449–460.
